# Supplementary material for: Evaluating the Tea Bag Index approach for different management practices in agroecosystems using long-term field experiments in Austria and Sweden
Source: Copernicus journal article supplement (doi:10.5194/soil-10-407-2024), 2024-06-12
Supplement: Supplementary file 1 [file soil-10-407-2024-supplement.pdf]

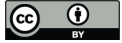

*Supplement of*

## **Evaluating the Tea Bag Index approach for different management practices in agroecosystems using long-term field experiments in Austria and Sweden**

**Maria Regina Gmach et al.**

*Correspondence to:* Maria Regina Gmach (gmachmr@gmail.com)

The copyright of individual parts of the supplement might differ from the article licence.

## Supplementary material

Table S1 - Soil properties at different sites in Austria and Sweden.

| Site           | Experiment | Soil texture | Treatment | Clay | SOC  | C:N  | pH  |
|----------------|------------|--------------|-----------|------|------|------|-----|
|                |            |              |           | (%)  |      |      |     |
| <i>Austria</i> |            |              |           |      |      |      |     |
| AT1            | CB         | Loam         | GM        | 33   | 2.17 | 10.6 | 7.1 |
|                |            |              | FW        | 33   | 2.17 | 10.6 | 7.1 |
|                |            |              | FYM       | 33   | 2.17 | 10.6 | 7.1 |
| AT2            | CB         | Loam         | BS        | 33   | 2.17 | 10.6 | 7.1 |
|                |            |              | GM        | 33   | 2.17 | 10.6 | 7.1 |
|                |            |              | FW        | 33   | 2.17 | 10.6 | 7.1 |
|                |            |              | FYM       | 33   | 2.17 | 10.6 | 7.1 |
|                |            |              | BS        | 33   | 2.17 | 10.6 | 7.1 |
| AT3            | CB         | Loamy silt   | 0 N       | 17   | 1.2  | 8.6  | 6.9 |
|                |            |              | 40 N      | 17   | 1.2  | 8.8  | 6.7 |
|                |            |              | 90 N      | 17   | 1.2  | 8.8  | 6.8 |
|                |            |              | 120 N     | 17   | 1.3  | 9.0  | 6.9 |
|                |            |              | CFW       | 17   | 1.6  | 8.9  | 7.1 |
|                |            |              | CGM       | 17   | 1.6  | 8.9  | 7.1 |
|                |            |              | CS        | 17   | 1.5  | 9.0  | 7.1 |
|                |            |              | CSS+80N   | 17   | 1.6  | 9.2  | 7.3 |
| AT4            | CB         | Loamy silt   | CRR       | 16   | 0.8  | 8.4  | 5.4 |
|                |            |              | CRI       | 16   | 0.9  | 8.3  | 5.6 |
| AT5            | CB         | Sand loam    | CRR       | 23   | 2.0  | 10.3 | 7.6 |
|                |            |              | CRI       | 23   | 2.2  | 10.4 | 7.6 |
| AT6            | CB         | Sand loam    | CRR       | 23   | 2.0  | 10.5 | 7.5 |
|                |            |              | CRI       | 23   | 2.2  | 10.2 | 7.5 |
| AT7            | SF         | Loam         | 60 N      | 34   | 2.8  | 11.7 | 7.7 |
|                |            |              | 90 N      | 34   | 2.8  | 12.1 | 7.7 |
|                |            |              | 120 N     | 34   | 2.9  | 11.4 | 7.7 |
|                |            |              | 145 N     | 34   | 2.9  | 11.1 | 7.7 |
| AT8            | SF         | Loam         | 60 N      | 34   | 2.8  | 11.7 | 7.6 |
|                |            |              | 90 N      | 34   | 2.8  | 12.1 | 7.7 |
|                |            |              | 120 N     | 34   | 2.9  | 11.3 | 7.7 |
|                |            |              | 145 N     | 34   | 2.9  | 11.4 | 7.6 |
| AT9            | SF         | Loam         | 60 N      | 29   | 3.2  | 10.5 | 7.7 |
|                |            |              | 90 N      | 29   | 3.3  | 10.5 | 7.7 |
|                |            |              | 120 N     | 29   | 3.3  | 10.6 | 7.7 |
|                |            |              | 145 N     | 29   | 3.3  | 10.3 | 7.7 |
| AT10           | SF         | Loam         | 0 K       | 18   | 2.8  | 11.3 | 7.7 |
|                |            |              | 150 K     | 18   | 2.8  | 11.3 | 7.8 |
|                |            |              | 300 K     | 18   | 2.8  | 11.3 | 7.7 |
| AT11           | SF         | Silty clay   | 0 K       | 30   | 2.8  | 10   | 6.6 |
|                |            |              | 150 K     | 30   | 2.8  | 10   | 6.8 |
|                |            |              | 300 K     | 30   | 2.8  | 10   | 6.9 |
| AT12           | SF         | Loamy        | 0 N       | 29   | 3.2  | 10.5 | 7.7 |
|                |            |              | 60 N      | 29   | 3.3  | 10.5 | 7.7 |
|                |            |              | 120 N     | 29   | 3.3  | 10.6 | 7.7 |
|                |            |              | 180 N     | 29   | 3.3  | 10.3 | 7.7 |
| AT13           | SF         | Loamy        | 0 N       | 27   | 0.9  | 8.1  | 6.7 |
|                |            |              | 60 N      | 27   | 1.0  | 8.2  | 6.4 |
|                |            |              | 120 N     | 27   | 1.0  | 8.4  | 6.3 |
|                |            |              | 180 N     | 27   | 1.0  | 8.1  | 6.2 |

|               |     |                 |             |     |     |      |     |
|---------------|-----|-----------------|-------------|-----|-----|------|-----|
| AT14          | SF  | Loamy silt      | 0 N         | 18  | 1.5 | 9.6  | 7.5 |
|               |     |                 | 60 N        | 18  | 1.6 | 9.6  | 7.5 |
|               |     |                 | 120 N       | 18  | 1.6 | 9.5  | 7.5 |
|               |     |                 | 180 N       | 18  | 1.5 | 9.4  | 7.5 |
| AT15          | TS  | Sand loam       | CT          | 22  | 1.7 | 11.0 | 7.6 |
|               |     |                 | SRT         | 22  | 2.2 | 10.4 | 7.4 |
|               |     |                 | DRT         | 22  | 1.7 | 10.6 | 7.5 |
| AT16          | TS  | Sand loam       | CT          | 22  | 1.6 | 10.3 | 7.6 |
|               |     |                 | SRT         | 22  | 2.0 | 10.0 | 7.5 |
|               |     |                 | DRT         | 22  | 1.7 | 10.4 | 7.6 |
| <b>Sweden</b> |     |                 |             |     |     |      |     |
| SE1           | CMP | Sandy clay loam | FYM/NPK     | 23  | 1.3 | 11.5 | 7.4 |
|               |     |                 | 0 FYM/0 NPK | 23  | 1.3 | 14.5 | 7.9 |
| SE2           | CMP | Loam            | FYM/NPK     | 18  | 2.7 | 12.9 | 6.8 |
|               |     |                 | 0 FYM/0 NPK | 18  | 2.1 | 13.9 | 7.2 |
| SE3           | CMP | Silty sand      | FYM/NPK     | 10  | 2.5 | 14.1 | 6.2 |
|               |     |                 | FYM/0 NPK   | 10  | 1.9 | 12.8 | 6.3 |
|               |     |                 | 0 FYM/NPK   | 10  | 2.1 | 14.3 | 6.4 |
|               |     |                 | 0 FYM/0 NPK | 10  | 1.6 | 13.5 | 6.6 |
| SE4           | CMP | Silty clay      | FYM/NPK     | 5.6 | 2.5 | 10.2 | 6.1 |
|               |     |                 | 0 FYM/0 NPK | 5.6 | 2.0 | 10.1 | 6.6 |
| SE5           | CMP | Silty loam      | FYM/NPK     | 13  | 2.5 | 12.7 | 6.1 |
|               |     |                 | 0 FYM/0 NPK | 13  | 2.5 | 12.7 | 6.2 |
| SE6           | CMP | Silty clay      | FYM/NPK     | 50  | 2.2 | 10.5 | 6.8 |
|               |     |                 | FYM/0 NPK   | 50  | 2.3 | 10.8 | 6.8 |
|               |     |                 | 0 FYM/NPK   | 50  | 2.3 | 11.1 | 6.9 |
|               |     |                 | 0 FYM/0 NPK | 50  | 2.0 | 10.6 | 7.1 |
| SE7           | ROT | Silty clay loam | SC          | 36  | 1.8 | 11.8 | 6.4 |
|               |     |                 | L           | 36  | 2.4 | 10.7 | 5.8 |
| SE8           | ROT | Sandy clay loam | SC          | 25  | 1.4 | 10.5 | 6.1 |
|               |     |                 | L           | 25  | 2.0 | 10.7 | 6.0 |
| SE9           | ROT | Silt loam       | SC          | 10  | 2.1 | 13.8 | 5.1 |
|               |     |                 | L           | 10  | 1.7 | 13.8 | 5.1 |
| SE10          | ROT | Silty clay loam | SC          | 36  | 2.3 | 11.0 | 5.6 |
|               |     |                 | L           | 36  | 2.8 | 10.7 | 5.6 |
| SE11          | TS  | Heavy clay      | CT          | 44  | 2.0 | 10.7 | 6.9 |
|               |     |                 | DS          | 44  | 2.0 | 10.7 | 6.9 |
| SE12          | TS  | Silty loam      | CT          | 18  | 2.8 | 10.7 | 6.1 |
|               |     |                 | SRT         | 18  | 2.8 | 10.7 | 6.1 |
|               |     |                 | DRT         | 18  | 2.8 | 10.7 | 6.1 |
|               |     |                 | DS          | 18  | 2.8 | 10.7 | 6.1 |
| SE13          | TS  | Silty clay loam | CT          | 38  | 1.2 | 10.7 | 6.1 |
|               |     |                 | DRT         | 38  | 1.2 | 10.7 | 6.1 |

Table S2 - Statistical analysis comparing effects of A) treatment within sites in Austria; and B) sites for specific treatments on *k* and *S*.

| Site            | A) Treatment | <i>k</i>            | <i>S</i>           | B) Site            | <i>k</i>            | <i>S</i> |
|-----------------|--------------|---------------------|--------------------|--------------------|---------------------|----------|
| Carbon balance  |              |                     |                    |                    |                     |          |
| AT1             | GM           | .0087 <sup>ns</sup> | .132 <sup>ns</sup> |                    |                     |          |
|                 | FW           | .0079               | .110               |                    |                     |          |
|                 | BS           | .0078               | .147               |                    |                     |          |
|                 | FYM          | .0069               | .151               |                    |                     |          |
| AT2             | GM           | .0055 <sup>ns</sup> | .423 ab            |                    |                     |          |
|                 | FW           | .0061               | .439 a             |                    |                     |          |
|                 | BS           | .0045               | .344 b             |                    |                     |          |
|                 | FYM          | .0048               | .380 ab            |                    |                     |          |
| AT3             | 0 N          | .0177 <sup>ns</sup> | .213 <sup>ns</sup> |                    |                     |          |
|                 | 40 N         | .0147               | .182               |                    |                     |          |
|                 | 90 N         | .0125               | .186               |                    |                     |          |
|                 | 120 N        | .0147               | .165               |                    |                     |          |
|                 | CFW          | .0143               | .176               |                    |                     |          |
|                 | CGM          | .0165               | .185               |                    |                     |          |
|                 | CS           | .0121               | .173               |                    |                     |          |
|                 | CSS          | .0150               | .188               |                    |                     |          |
|                 | CFW+80       | .0167               | .207               |                    |                     |          |
|                 | CGM+80       | .0139               | .176               |                    |                     |          |
|                 | CS+80        | .0177               | .177               |                    |                     |          |
|                 | CSS+80       | .0128               | .171               |                    |                     |          |
|                 | AT4 & AT6    | CRR                 | .0061 b            | .185 <sup>ns</sup> | AT4                 | .0058 b  |
| CRI             |              | .0087 a             | .172               | AT6                | .0089 a             | .144 b   |
| AT5             | CRR          | .0083 <sup>ns</sup> | .312 <sup>ns</sup> |                    |                     |          |
|                 | CRI          | .0083               | .319               |                    |                     |          |
| AT5 & AT6       | CRR          | .0080 b             | .231 <sup>ns</sup> | AT5                | .0083 <sup>ns</sup> | .315 a   |
|                 | CRI          | .0093 a             | .228               | AT6                | .0089               | .144 b   |
| Soil fertility  |              |                     |                    |                    |                     |          |
| AT7 & AT9       | 60 N         | .0140 <sup>ns</sup> | .379 <sup>ns</sup> | AT7                | .0128 <sup>ns</sup> | .338 b   |
|                 | 90 N         | .0120               | .392               | AT9                | .0118               | .417 a   |
|                 | 120 N        | .0115 <sup>ns</sup> | .363 <sup>ns</sup> |                    |                     |          |
|                 | 145 N        | .0127               | .392               |                    |                     |          |
| AT8             | 60 N         | .0164               | .305               |                    |                     |          |
|                 | 90 N         | .0153               | .335               |                    |                     |          |
|                 | 120 N        | .0130               | .335               |                    |                     |          |
|                 | 145 N        | .0135               | .326               |                    |                     |          |
| AT10 & AT11     | 0 P          | .0087 <sup>ns</sup> | .124 <sup>ns</sup> | AT10               | .0082 b             | .113 b   |
|                 | 150 P        | .0093               | .140               | AT11               | .0105 a             | .156 a   |
|                 | 300 P        | .0095               | .129               |                    |                     |          |
| AT12 AT13 AT14  | 0 N          | .0066 b             | .174 <sup>ns</sup> | AT12               | .0093 a             | .148 b   |
|                 | 60 N         | .0090 ab            | .150               | AT13               | .0072 b             | .195 a   |
|                 | 120 N        | .0084 ab            | .162               | AT14               | .0086 ab            | .141 b   |
|                 | 180 N        | .0095 a             | .160               |                    |                     |          |
| Tillage systems |              |                     |                    |                    |                     |          |
| AT15            | CT           | .0092 b             | .198 a             |                    |                     |          |
|                 | SRT          | .0147 a             | .154 b             |                    |                     |          |
|                 | DRT          | .0105 b             | .197 a             |                    |                     |          |
| AT16            | CT           | .0087 <sup>ns</sup> | .439 <sup>ns</sup> |                    |                     |          |
|                 | SRT          | .0100               | .465               |                    |                     |          |
|                 | DRT          | .0118               | .421               |                    |                     |          |
| AT15 & AT16     |              |                     |                    | AT15               | .0115 <sup>ns</sup> | .183 b   |
|                 |              |                     |                    | AT16               | .0102               | .442 a   |

Mean values followed by the same letter within treatments and within sites did not differ according to Tukey's test ( $p < 0.05$ ). ns: not significant.

Table S3 - Statistical analysis comparing A) different treatments within sites in Sweden; B) different sites presenting the same treatments in Sweden; and C) different treatments and sites for Tillage System (TS) experiment category in Austria and Sweden.

| A) Treatment                                        | <i>k</i> | <i>S</i>           | B) Site          | <i>k</i>            | <i>S</i> |
|-----------------------------------------------------|----------|--------------------|------------------|---------------------|----------|
| Combined management practices                       |          |                    |                  |                     |          |
| FYM/NPK                                             | .0195 a  | .253 a             | SE1              | .0150 ab            | .125 d   |
| 0FYM/0NPK                                           | .0130 b  | .206 b             | SE2              | .0167 ab            | .129 d   |
|                                                     |          |                    | SE3              | .0147 ab            | .361 a   |
|                                                     |          |                    | SE4              | .0084 b             | .118 c   |
|                                                     |          |                    | SE5              | .0301 a             | .270 b   |
|                                                     |          |                    | SE6              | .0210 a             | .335 ab  |
|                                                     |          |                    | Rotation systems |                     |          |
| SC                                                  | .0166 a  | .263 <sup>ns</sup> | SE7              | .0144 b             | .323 a   |
| L                                                   | .0137 b  | .267               | SE8              | .0133 b             | .337 a   |
|                                                     |          |                    | SE9              | .0202 a             | .199 b   |
|                                                     |          |                    | SE10             | .0130 b             | .200 b   |
| Tillage systems                                     |          |                    |                  |                     |          |
| CT                                                  | .0122 b  | .251 b             | SE11             | .0145 <sup>ns</sup> | .267 ab  |
| SRT                                                 | .0130 ab | .275 ab            | SE12             | .0131               | .294 a   |
| DRT                                                 | .0153 a  | .299 a             | SE13             | .0130               | .247 b   |
| DS                                                  | .0126 ab | .279 ab            |                  |                     |          |
| C) Tillage systems experiment in Austria and Sweden |          |                    |                  |                     |          |
| Treatment                                           | <i>k</i> | <i>S</i>           | Site             | <i>k</i>            | <i>S</i> |
| Tillage systems                                     |          |                    |                  |                     |          |
| CT                                                  | .0113 b  | .298 b             | SE11             | .0175 a             | .279 b   |
| SRT                                                 | .0115 ab | .370 a             | SE12             | .0130 a             | .294 b   |
| DRT                                                 | .0143 a  | .336 ab            | SE13             | .0130 a             | .247 b   |
|                                                     |          |                    | AT16             | .0102 b             | .442 a   |

Mean values followed by the same letter within treatments and within sites did not differ according to Tukey's test ( $p < 0.05$ ). ns: not significant.

Table S4 – Correlation coefficients between the mean TBI parameters ( $k$  and  $S$ ) and pedo-climatic parameters, in Austria and Sweden.

| Parameter          | Austria  |           | Sweden  |          | Austria and Sweden |          |
|--------------------|----------|-----------|---------|----------|--------------------|----------|
|                    | $k$      | $S$       | $k$     | $S$      | $k$                | $S$      |
| MAT                | 0.410    | -0.038    | -0.586* | 0.016    | -0.751***          | -0.290   |
| MAT <sub>TBI</sub> | -0.417   | -0.339    | -0.073  | -0.784** | -0.634***          | -0.497*  |
| TAP                | -0.580*  | -0.020    | 0.392   | -0.233   | -0.533**           | -0.328   |
| TP <sub>TBI</sub>  | -0.479   | -0.026    | 0.310   | -0.216   | -0.394             | -0.251   |
| PET                | -0.289   | 0.155     | -0.263  | 0.305    | -0.656***          | -0.174   |
| PET <sub>TBI</sub> | -0.233   | 0.133     | -0.152  | 0.208    | -0.480*            | -0.094   |
| AI                 | 0.428    | 0.108     | -0.465  | 0.374    | -0.232             | 0.229    |
| AI <sub>TBI</sub>  | 0.334    | -0.044    | -0.323  | 0.307    | 0.023              | 0.198    |
| T x P              | -0.617*  | -0.059    | -0.122  | 0.003    | -0.686***          | -0.307   |
| $Re_{clim}$        | -0.707** | -0.756**  | -0.067  | -0.373   | -0.603**           | -0.538** |
| $Re_{temp}$        | -0.597*  | -0.829*** | -0.167  | -0.746** | -0.617**           | -0.628** |
| $Re_{wat}$         | -0.519   | -0.013    | 0.167   | -0.034   | 0.077              | 0.087    |
| pH                 | 0.480    | 0.059     | -0.077  | -0.216   | -0.288             | -0.237   |
| Clay               | 0.151    | 0.098     | -0.165  | 0.237    | -0.153             | 0.150    |
| SOC                | 0.409    | 0.049     | 0.222   | 0.103    | 0.243              | 0.015    |
| C:N ratio          | 0.044    | 0.300     | 0.541*  | -0.287   | 0.642***           | 0.063    |

MAT: mean annual temperature; MAT<sub>TBI</sub>: mean temperature during TBI period; TAP: total annual precipitation; TP<sub>TBI</sub>: total precipitation during TBI period; PET: potential evapotranspiration; PET<sub>TBI</sub>: potential evapotranspiration during TBI period; AI: aridity index; AI<sub>TBI</sub>: aridity index during TBI period; TxP: temperature times precipitation factor;  $Re_{clim}$ : climatic factor model;  $Re_{temp}$ : temperature factor model;  $Re_{wat}$ : soil moisture factor model.
